New!

## Diagnostic and Statistical Manual of Mental Disorders, Fifth Edition, Text Revision (DSM-5-TR™)

American Psychiatric Association

The *Diagnostic and Statistical Manual of Mental Disorders, Fifth Edition, Text Revision (DSM-5-TR)*, is the most comprehensive, current, and critical resource for clinical practice available to today's mental health clinicians and researchers. DSM-5-TR includes the fully revised text and references, updated diagnostic criteria and ICD-10-CM codes since DSM-5 was published in 2013. It features a new disorder, Prolonged Grief Disorder, as well as codes for suicidal behavior available to all clinicians of any discipline without the requirement of any other diagnosis.

With contributions from over 200 subject matter experts, this updated volume boasts the most current text updates based on the scientific literature. Now in four-color and with the ability to authenticate each printed copy, DSM-5-TR provides a cohesive, updated presentation of criteria, diagnostic codes, and text. This latest volume offers a common language for clinicians involved in the diagnosis and study of mental disorders and facilitates an objective assessment

of symptom presentations across a variety of clinical settings—inpatient, outpatient, partial hospital, consultation-liaison, clinical, private practice, and primary care.

2022 • 1,250 pages • ISBN 978-0-89042-575-6 • Hardcover • \$220.00 • Item #2575

2022 • 1,250 pages • ISBN 978-0-89042-576-3 • Paperback • \$170.00 • Item #2576

2022 • 1,250 pages • ISBN 978-0-89042-577-0 • eBook • \$136.00 • Item #2577

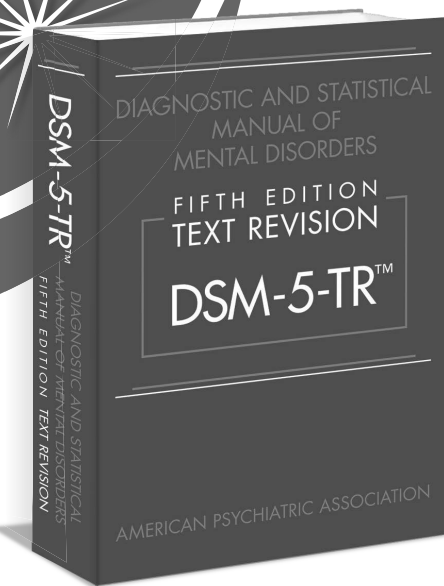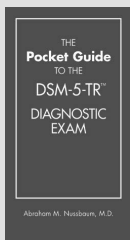

### The Pocket Guide to the DSM-5-TR® Diagnostic Exam

Abraham M. Nussbaum, M.D., M.T.S.

This book is the clinician's companion for using *DSM-5-TR™* in diagnostic interviews. Beginning with an introduction to the diagnostic interview, the *Pocket Guide* addresses the goals of the interview, provides an efficient structure for learning how to conduct one, reviews the screening questions, and then

explains the ways in which *DSM-5-TR™* impacts the interview.

2022 • 298 pages • ISBN 978-1-61537-357-4 • Paperback  
\$75.00 • Item #37357

2022 • 298 pages • ISBN 978-1-61537-358-1 • eBook  
\$60.00 • Item #37358

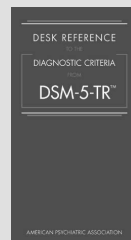

### Desk Reference to the Diagnostic Criteria from DSM-5-TR®

American Psychiatric Association

This handy reference provides quick access to the information essential to making a diagnosis. Designed to supplement *DSM-5-TR™*, this convenient guide will assist all mental health professionals as they integrate the *DSM-5-TR™* diagnostic criteria into their diagnoses.

2022 • 392 pages • ISBN 978-0-89042-579-4 • Paperback  
\$75.00 • Item #2579

2022 • 392 pages • ISBN 978-0-89042-580-0 • Spiralbound  
\$75.00 • Item #2580

2022 • 392 pages • ISBN 978-0-89042-581-7 • eBook  
\$60.00 • Item #2581

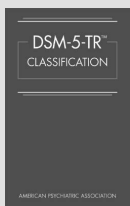

### DSM-5-TR® Classification

American Psychiatric Association

This handy *DSM-5-TR™ Classification* provides a ready reference to the DSM-5-TR classification of disorders, as well as the DSM-5-TR listings of ICD-10-CM codes for all DSM-5-TR diagnoses. To be used in tandem with DSM-5-TR™ or the *Desk Reference to the Diagnostic Criteria From DSM-5-TR™* the *DSM-5-TR™ Classification* makes

accessing the proper diagnostic codes quick and convenient.

2022 • 159 pages • ISBN 978-0-89042-583-1 • Spiralbound  
\$35.00 • Item #2583

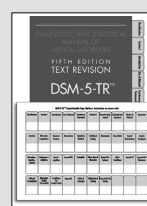

### DSM-5-TR® Repositionable Page Markers

American Psychiatric Association

The *DSM-5-TR™ Repositionable Page Markers* are designed to help you quickly and easily locate key information within DSM-5-TR™. The markers are made with a non-permanent adhesive and may be repositioned within your manual at any time.

2022 • 1 page • ISBN 978-0-89042-582-4  
Repositionable Page Markers • \$12.50 • Item #2582

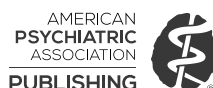

ORDER @ [www.appi.org](http://www.appi.org)  
Email: [appi@psych.org](mailto:appi@psych.org) | Toll Free: 1-800-368-5777

20% Discount for American Psychiatric Association Members  
25% Discount for APA Resident-Fellow Members

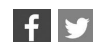

Priority Code AH2202

# PSYCHIATRYonline

Your Destination for Lifelong Learning in Psychiatry

The one-stop resource for information on diagnosis, treatment, guidelines, the latest research, and breaking news from the field.

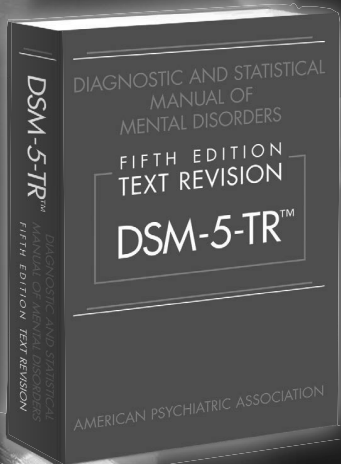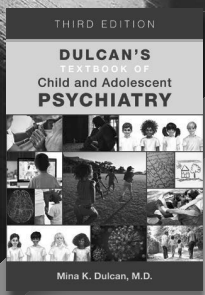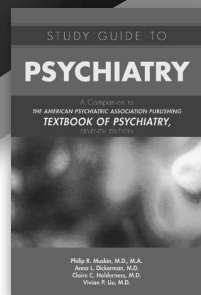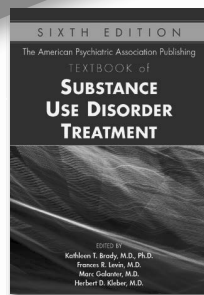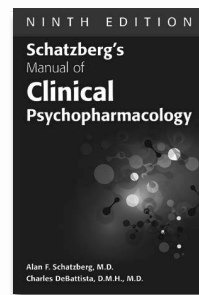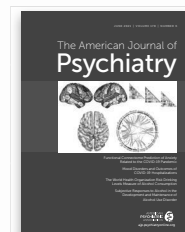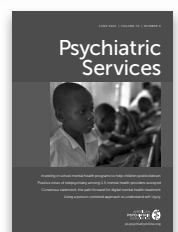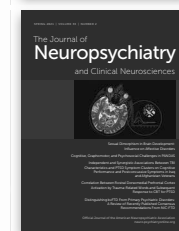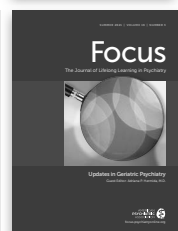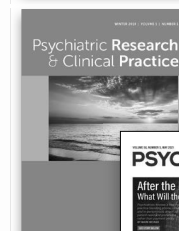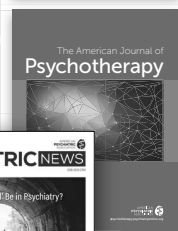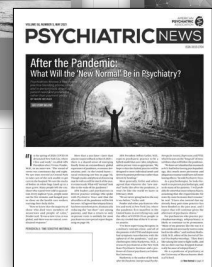

**PsychiatryOnline.org** is the platform for all American Psychiatric Association Publishing journals, *DSM-5-TR™*, and bestselling textbooks, as well as APA Practice Guidelines, and continuing medical education.

This is a one-stop resource for information on psychiatric diagnosis, treatment, guidelines, the latest research, and breaking news from the field. From a single location, users can search across all books and journals to find the most relevant content easier than ever.

Subscribe to products individually or to the DSM Select package that includes the DSM-5® library, books and select journals.

**Go to [www.appi.org](http://www.appi.org) to subscribe.**

*Institutional subscription options are available.*

For more information contact: [institutions@psych.org](mailto:institutions@psych.org);  
800-368-5777 ext. 3729

AMERICAN  
PSYCHIATRIC  
ASSOCIATION  
PUBLISHING

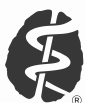

[psychiatryonline.org](http://psychiatryonline.org)



Searching for  
the perfect  
psychiatric  
career?

## Let APA JobCentral help!

### Manage Your Career

- Browse hundreds of active job listings!
- Create an account to save jobs, store multiple resumes and cover letters and communicate with employers through our internal messaging system.
- Set up multiple job alerts specifying your skills, interests and location to receive e-mails when employers post jobs that match your criteria.

### Recruit for Open Positions

- Post your job in front of thousands of highly qualified psychiatrists.
- Cross promote your job listing in Psychiatric News.
- Search the anonymous resume database to find your ideal candidate.

AMERICAN  
PSYCHIATRIC  
ASSOCIATION

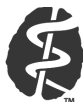

**JOBCENTRAL**  
The Career Hub for Psychiatry

[jobs.psychiatry.org](https://jobs.psychiatry.org)

# NEW TITLES from AMERICAN PSYCHIATRIC ASSOCIATION PUBLISHING

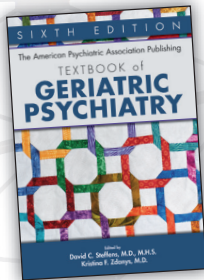

## The American Psychiatric Association Publishing Textbook of Geriatric Psychiatry, Sixth Edition

Edited by David C. Steffens, M.D., M.H.S., and  
Kristina F. Zdanys, M.D.

This sixth edition has been extensively updated to include the latest information on phenomenology, diagnosis, and assessment of late-life mental disorders as well as the most up-to-date research on psychotherapeutic, psychopharmacological, and other somatic treatments.

2023 • 848 pages • ISBN 978-1-61537-340-6 • Hardcover • \$200.00 • Item #37340  
2023 • 848 pages • ISBN 978-1-61537-437-3 • eBook • \$160.00 • Item #37437

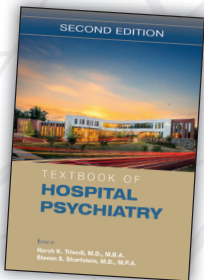

## Textbook of Hospital Psychiatry, Second Edition

Edited by Harsh K. Trivedi, M.D., M.B.A., and  
Steven S. Sharfstein, M.D., M.P.A.

When it was originally published in 2009, the *Textbook of Hospital Psychiatry* was the first comprehensive guide to hit the market in more than a decade. This updated edition includes new material in each of the chapters, with a focus on treatment, staffing, and quality-of-care changes, and offers new, forward-looking chapters on consumer and family perspectives, collaborative care, safety, and more.

2023 • 703 pages • ISBN 978-1-61537-345-1 • Hardcover • \$155.00 • Item #37345  
2023 • 703 pages • ISBN 978-1-61537-440-3 • eBook • \$124.00 • Item #37440

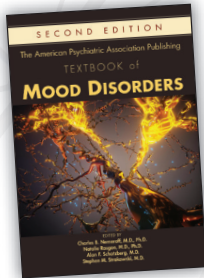

## The American Psychiatric Association Publishing Textbook of Mood Disorders, Second Edition

Edited by Charles B. Nemeroff, M.D., Ph.D.,  
Alan F. Schatzberg, M.D.,  
Natalie Rasgon, M.D., Ph.D., and  
Stephen M. Strakowski, M.D.

The new edition is an authoritative, comprehensive, and evidence-based book that captures cutting-edge thinking on the epidemiology, pathogenesis, treatment, and management of mood disorders. Indeed, much has changed in the study and practice around mood disorders in the 16 years since the first edition. For example, reflecting growth in the field of psychoneuroimmunology, the book reviews the latest research on the role of the immune system in mood disorders. In addition, epigenetics—which is proving useful in understanding depression and bipolar disorder—is explored, giving psychiatrists and other mental health care providers the knowledge, they need to stay abreast of advances. While the book's logical structure has been retained, each informative chapter offers fresh perspectives that rejuvenate and revivify the classic text.

2022 • 986 pages • ISBN 978-1-61537-331-4 • Hardcover • \$195.00 • Item #37331  
2022 • 986 pages • ISBN 978-1-61537-452-6 • eBook • \$156.00 • Item #37452

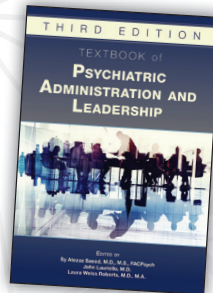

## Textbook of Psychiatric Administration and Leadership, Third Edition

Edited by Sy Saeed, M.D., M.S., FACPsych,  
John Lauriello, M.D., and  
Laura Weiss Roberts, M.D., M.A.

In clear, accessible prose, chapter authors offer evidence-based best practices on topics such as organizational theory, business development and revenue generation, and talent acquisition and management. Throughout, case vignettes help translate the information from page to practice. Importantly, each subject area is also examined through the lens of the needs and choices of both patients and personnel and considers a multiplicity of perspectives so that readers come away with a holistic understanding of the role and skills of successful administrators and leaders.

2023 • 544 pages • ISBN 978-1-61537-337-6 • Hardcover • \$154.00 • Item #37337  
2023 • 544 pages • ISBN 978-1-61537-434-2 • eBook • \$123.00 • Item #37434

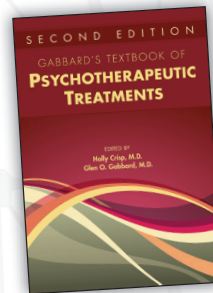

## Gabbard's Textbook of Psychotherapeutic Treatments, Second Edition

Edited by Holly Crisp, M.D.,  
and Glen O. Gabbard, M.D.

This second edition reflects not just advances in psychotherapy—the latest empirical data, as well as an increased understanding of the interface between brain and mind—but also changes in society that have had profound impacts on how therapists practice, including the advancement of LGBTQ+ rights, calls for racial and social justice, and the COVID-19 pandemic.

2023 • 830 pages • ISBN 978-1-61537-326-0 • Hardcover • \$145.00 • Item #37326  
2023 • 830 pages • ISBN 978-1-61537-406-9 • eBook • \$116.00 • Item #37406

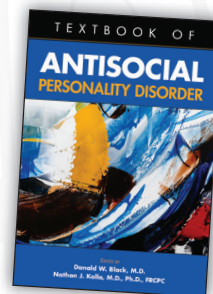

## Textbook of Antisocial Personality Disorder

Edited by Donald W. Black, M.D., and  
Nathan J. Kolla, M.D.

The most current, comprehensive work available to date, this is the definitive source of information on this difficult and often poorly understood and underdiagnosed disorder. A group of distinguished international experts, researchers, and clinicians provide their unique perspectives on what has been learned so far about antisocial personality disorder (ASPD) and other forms of antisocial behavior, including childhood conduct disorder, adult antisocial behavior, and psychopathy. The book looks at the phenomenology and natural course of ASPD, as well as its neuropathology, neurophysiology, genetic risk factors, epigenetics, and social determinants.

2022 • 535 pages • ISBN 978-1-61537-323-9 • Hardcover • \$105.00 • Item #37323  
2022 • 535 pages • ISBN 978-1-61537-322-2 • eBook • \$84.00 • Item #37322

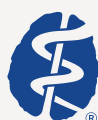

Source: https://focus.psychiatryonline.org/doi/suppl/10.1176/foc.2023.21.issue-3/suppl_file/back.pdf
