SUMMER 2023 | VOLUME 21 | NUMBER 3

# Focus

The Journal of Lifelong Learning in Psychiatry

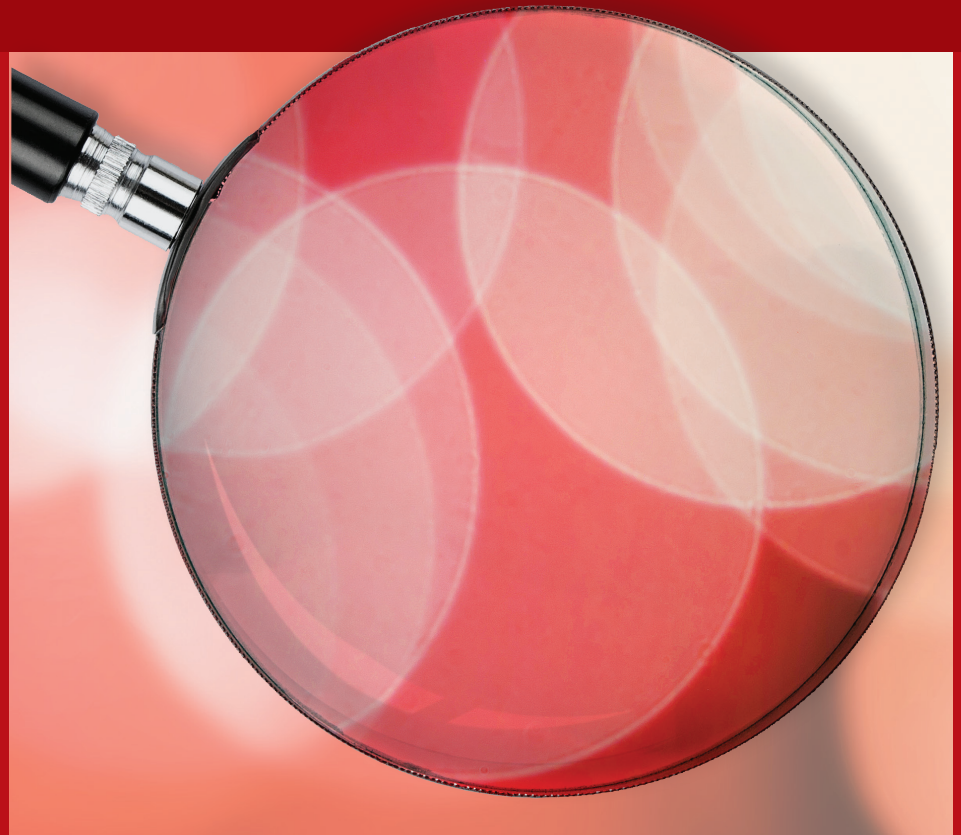

## Novel Mechanisms and Interventions for PTSD

Guest Editor: Negar Fani, Ph.D.

AMERICAN  
PSYCHIATRIC  
ASSOCIATION

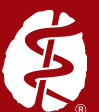

[focus.psychiatryonline.org](http://focus.psychiatryonline.org)
